# Supplementary material for: Exploring the Effects of Six Weeks of Resistance Training on the Fecal Microbiome of Older Adult Males: Secondary Analysis of a Peanut Protein Supplemented Randomized Controlled Trial
Source: MDPI journal article supplement (doi:10.3390/sports10050065), 2022-04-22
Supplement: s1 [file s1]

## FastQC: Mean Quality Scores

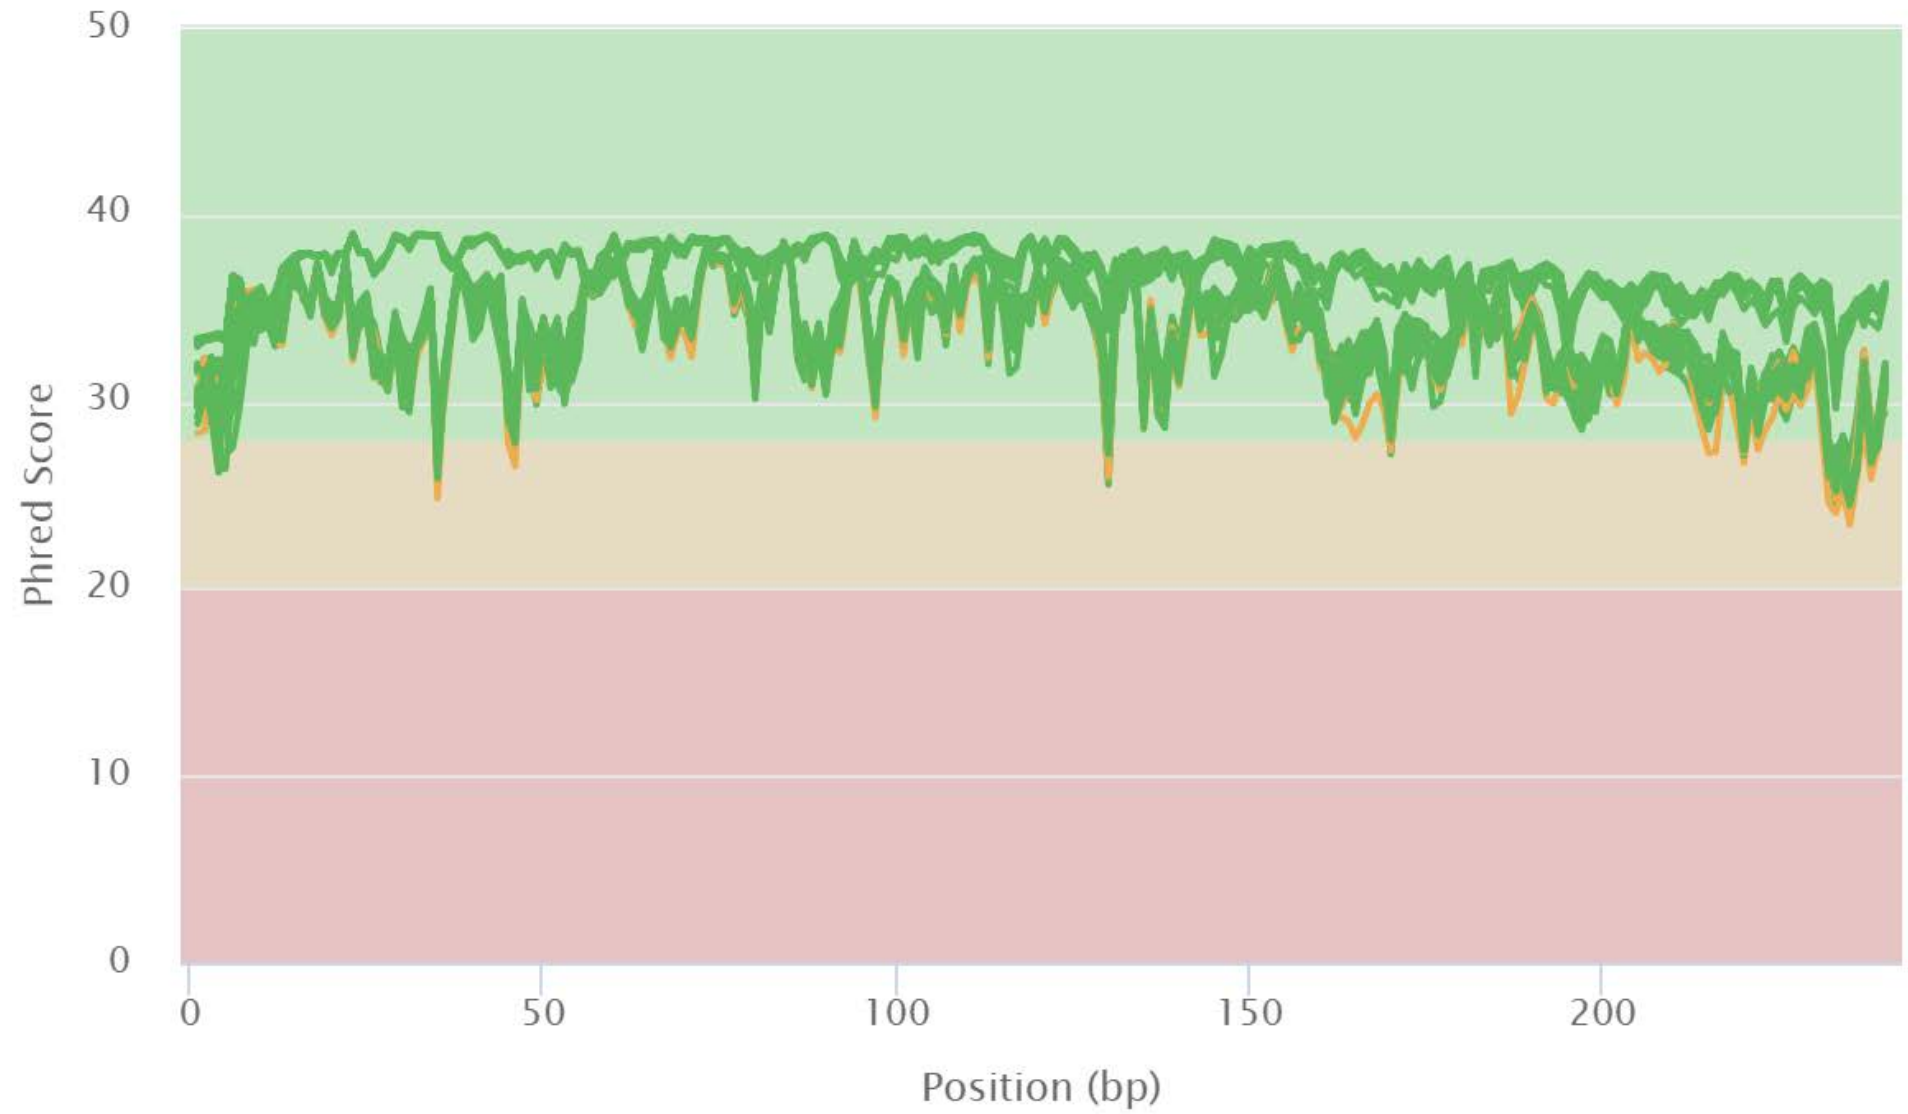

**Figure S1.** Phred scores of study samples (n = 28) indicating >99.9% accuracy.

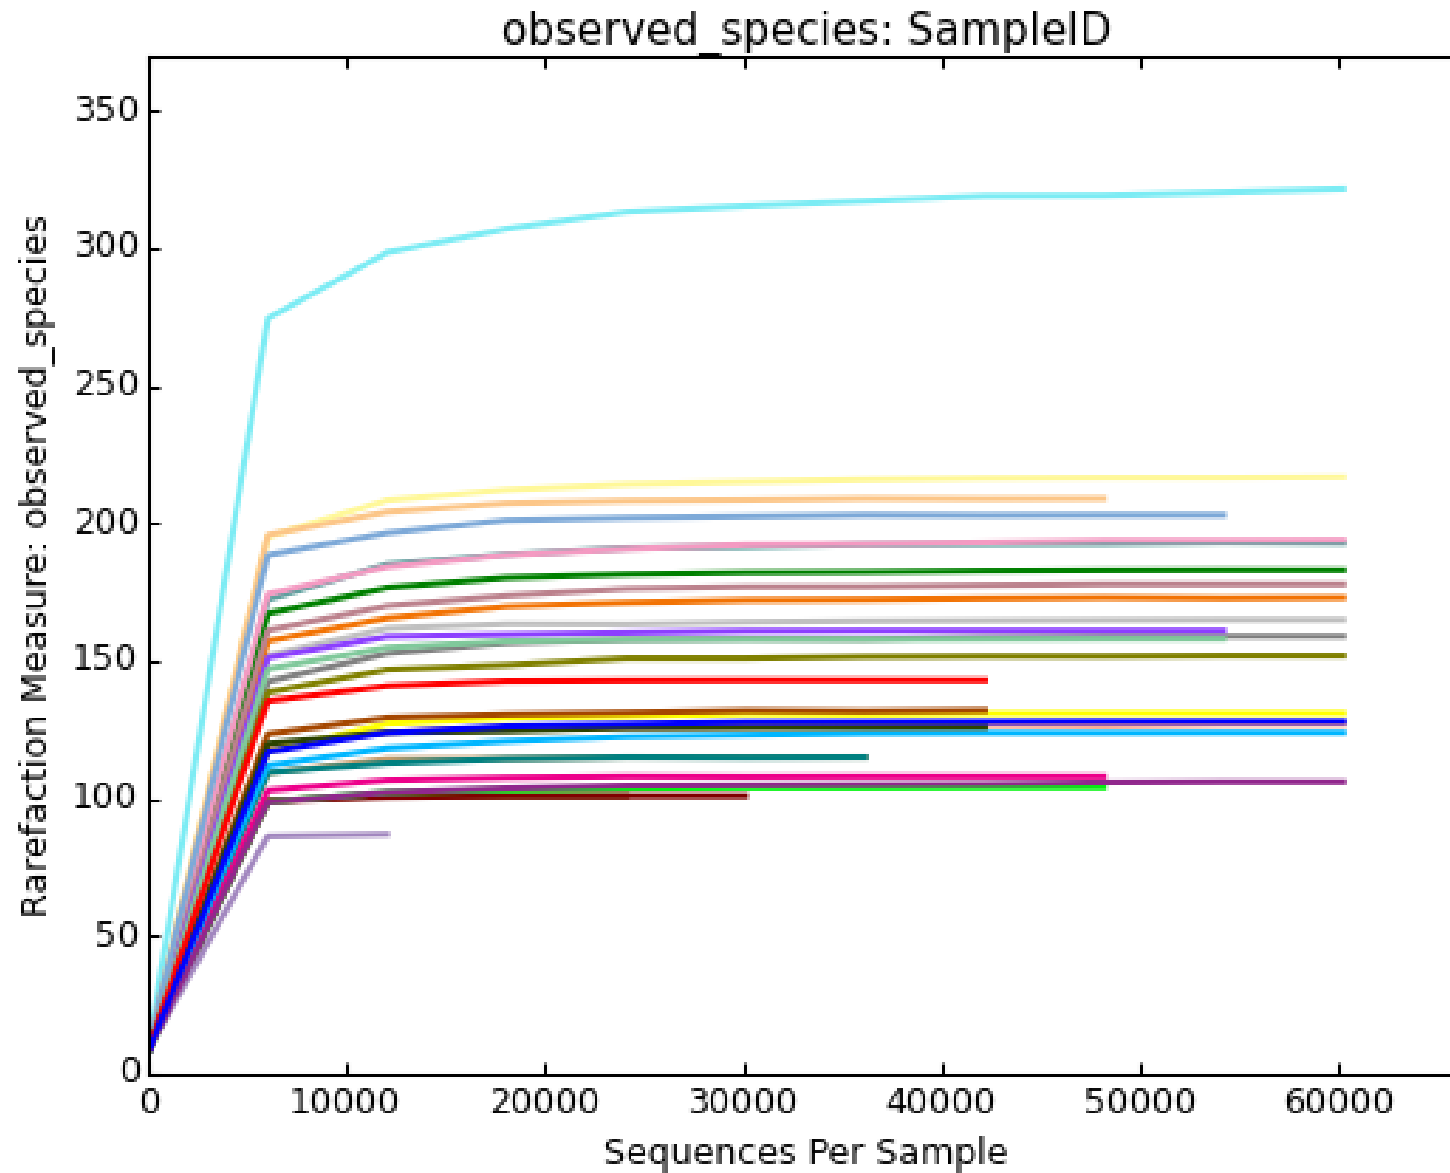

**Figure S2.** Rarefaction curve of alpha diversity (observed species) by sample. The sample with ~300 observed species was excluded due to its corresponding sample having insufficient (<10 k) reads per sample.

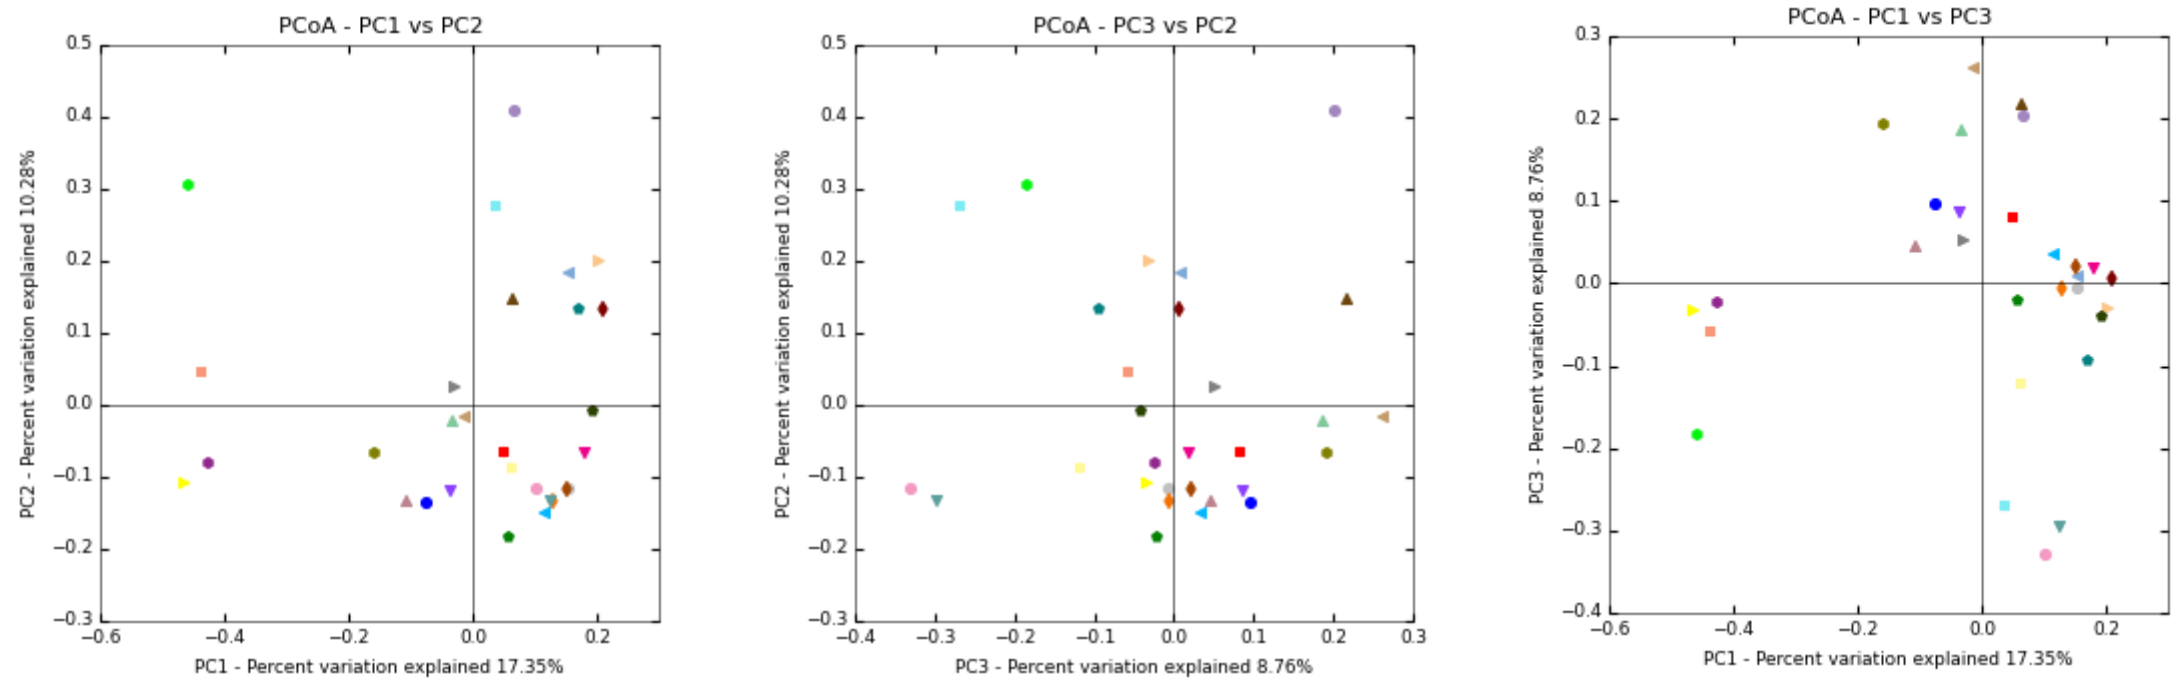

**Figure S3.** Principal Coordinate Analysis (PCoA) plots of Beta Diversity (Bray Curtis),  $p = 0.819$
